# Supplementary material
Source: MDPI journal article supplement (https://www.mdpi.com/2297-8739/11/5/142)
Supplement: s1 [file s1]

Table S1. Phase equilibrium data for the ATPS of E-1006 and (NH<sub>4</sub>)<sub>2</sub>SO<sub>4</sub> at different temperature.

| Temperature | Overall composition |           | E-1006-rich phase composition |           | (NH <sub>4</sub> ) <sub>2</sub> SO <sub>4</sub> -rich phase composition |           |
|-------------|---------------------|-----------|-------------------------------|-----------|-------------------------------------------------------------------------|-----------|
|             | $w_1(\%)$           | $w_2(\%)$ | $w_1(\%)$                     | $w_2(\%)$ | $w_1(\%)$                                                               | $w_2(\%)$ |
| 303.15 K    | 4.00                | 12.00     | 3.73                          | 18.33     | 4.89                                                                    | 1.79      |
|             | 5.00                | 14.00     | 3.37                          | 25.39     | 5.85                                                                    | 1.68      |
|             | 6.00                | 16.00     | 3.32                          | 32.01     | 7.72                                                                    | 1.57      |
|             | 7.00                | 18.00     | 2.96                          | 39.62     | 8.89                                                                    | 1.55      |
|             | 8.00                | 20.00     | 2.39                          | 47.96     | 10.51                                                                   | 1.53      |
|             | 9.00                | 22.00     | 1.76                          | 55.79     | 12.29                                                                   | 1.33      |
| 313.15 K    | 4.00                | 12.00     | 2.69                          | 27.81     | 4.89                                                                    | 1.11      |
|             | 5.00                | 14.00     | 2.57                          | 33.91     | 5.90                                                                    | 1.08      |
|             | 6.00                | 16.00     | 2.19                          | 41.85     | 7.80                                                                    | 0.79      |
|             | 7.00                | 18.00     | 1.83                          | 48.00     | 8.96                                                                    | 0.77      |
|             | 8.00                | 20.00     | 1.46                          | 54.32     | 10.84                                                                   | 0.70      |
|             | 9.00                | 22.00     | 1.09                          | 58.30     | 12.47                                                                   | 0.66      |
| 323.15 K    | 4.00                | 12.00     | 1.75                          | 43.09     | 5.06                                                                    | 0.88      |
|             | 5.00                | 14.00     | 1.54                          | 47.82     | 6.05                                                                    | 0.88      |
|             | 6.00                | 16.00     | 1.04                          | 54.75     | 7.96                                                                    | 0.86      |
|             | 7.00                | 18.00     | 0.93                          | 57.36     | 9.55                                                                    | 0.83      |
|             | 8.00                | 20.00     | 0.85                          | 58.86     | 10.94                                                                   | 0.83      |
|             | 9.00                | 22.00     | 0.25                          | 66.35     | 14.34                                                                   | 0.81      |

In Table S1,  $w_1$  represents the mass fraction of (NH<sub>4</sub>)<sub>2</sub>SO<sub>4</sub> and  $w_2$  represents the mass fraction of E-1006.
